# Supplementary material for: Development of a 3-Dimensional Model to Study Right Heart Dysfunction in Pulmonary Arterial Hypertension: First Observations
Source: MDPI journal article supplement (doi:10.3390/cells10123595), 2021-12-20
Supplement: s1 [file s1]

**Supplementary Table S1.** List of primer sequences used for the gene expression analysis

| Gene                                                         | Primer sequences                                           |
|--------------------------------------------------------------|------------------------------------------------------------|
| Glyceraldehyde-3-phosphate dehydrogenase<br>( <i>GAPDH</i> ) | FWD: GGTCTCCTCTGACTTCAACA<br>REV: AGCCAAATTCGTTGTCATAC     |
| Ribosomal protein L27 ( <i>RPL27</i> )                       | FWD: TACAGCAGTGGAGGGAGACC<br>REV: TCTGAAGACATCCTTATTGACG   |
| Hypoxanthine phosphoribosyltransferase 1<br>( <i>HPRT1</i> ) | FWD: CCTGGCGTCGTGATTAGTGAT<br>REV: AGACGTTCAAGTCCTGTCCATAA |
| NK2 homeobox 5 ( <i>NKX2.5</i> )                             | FWD: CCAAGGACCCTAGAGCCGAA<br>REV: ATAGGCGGGGTAGGCGTTAT     |
| T-box transcription factor 5 ( <i>TBX5</i> )                 | FWD: CTGTGGCTAAAATTCCACGAAGT<br>REV: GTGATCGTCGGCAGGTACAAT |
| Myocyte enhancer factor 2A ( <i>MEF2A</i> )                  | FWD: GGTCTGCCACCTCAGAACTTT<br>REV: CCCTGGGTAGTGTTAGGACAA   |
| Myocyte enhancer factor 2C ( <i>MEF2C</i> )                  | FWD: CCAACTTCGAGATGCCAGTCT<br>REV: GTCGATGTGTTACACCAGGAG   |
| GATA binding protein 4 ( <i>GATA4</i> )                      | FWD: GTGTCCCAGACGTTCTCAGTC<br>REV: GGGAGACGCATAGCCTTGT     |
| Actinin alpha 1 ( <i>ACTN1</i> )                             | FWD: CCACCCTCTCGGAGATCAAG<br>REV: TCCCTTCGCTTCTGAGTTAGG    |

|                                                                                                |                                                              |
|------------------------------------------------------------------------------------------------|--------------------------------------------------------------|
| Myosin heavy chain 6 ( <i>MYH6</i> )                                                           | FWD: GCCCTTTGACATTGCACTG<br>REV: CGGGACAAAATCTTGGCTTTGA      |
| Myosin heavy chain 7 ( <i>MYH7</i> )                                                           | FWD: ACTGCCGAGACCGAGTATG<br>REV: GCGATCCTTGAGGTTGTAGAGC      |
| Myosin light chain 2 ( <i>MYL2</i> )                                                           | FWD: TTGGGCGAGTGAACGTGAAAA<br>REV: CCGAACGTAATCAGCCTTCAG     |
| Myosin light chain 7 ( <i>MYL7</i> )                                                           | FWD: CAACGTGGTTCTTCCAACGTC<br>REV: CAACGTGGTTCTTCCAACGTC     |
| Cardiac troponin I3 ( <i>TNNI3</i> )                                                           | FWD: TTTGACCTTCGAGGCAAGTTT<br>REV: CCCGGTTTTCTTCTCGGTG       |
| Cardiac troponin T2 ( <i>TNNT2</i> )                                                           | FWD: AATGGAGGAGTCCAAACCAAAG<br>REV: CCAAGTTGGGCATGAACGAC     |
| ATPase sarcoplasmic/endoplasmic reticulum<br>Ca <sup>2+</sup> transporting 2 ( <i>ATP2A2</i> ) | FWD: ATGGGGCTCCAACGAGTTAC<br>REV: TTTCCTGCCATACACCCACAA      |
| Gap junction protein, alpha 1 ( <i>GJA1</i> ) also<br>known as Connexin43 ( <i>CX43</i> )      | FWD: GGGACAGCGGTTGAGTCAG<br>REV: TGTTACAACGAAAGGCAGACTG      |
| Natriuretic peptide A ( <i>NPPA</i> )                                                          | FWD: CAACGCAGACCTGATGGATTT<br>REV: AGCCCCCGCTTCTTCATTC       |
| Natriuretic peptide B ( <i>NPPB</i> )                                                          | FWD: GGGCGCTCCTGCTCCTGCTCTTC<br>REV: ACACCTGTGGGACGGGGGCTCTC |
